# Supplementary material for: Sustainable waste management and recycling of Zn–Al layered double hydroxide after adsorption of levofloxacin as a safe anti-inflammatory nanomaterial
Source: Royal Society of Chemistry journal article supplement (doi:10.1039/d0ra04898d), 2020-01-01
Supplement: d0ra04898d1.pdf [file d0ra04898d1.pdf]

## Supporting information

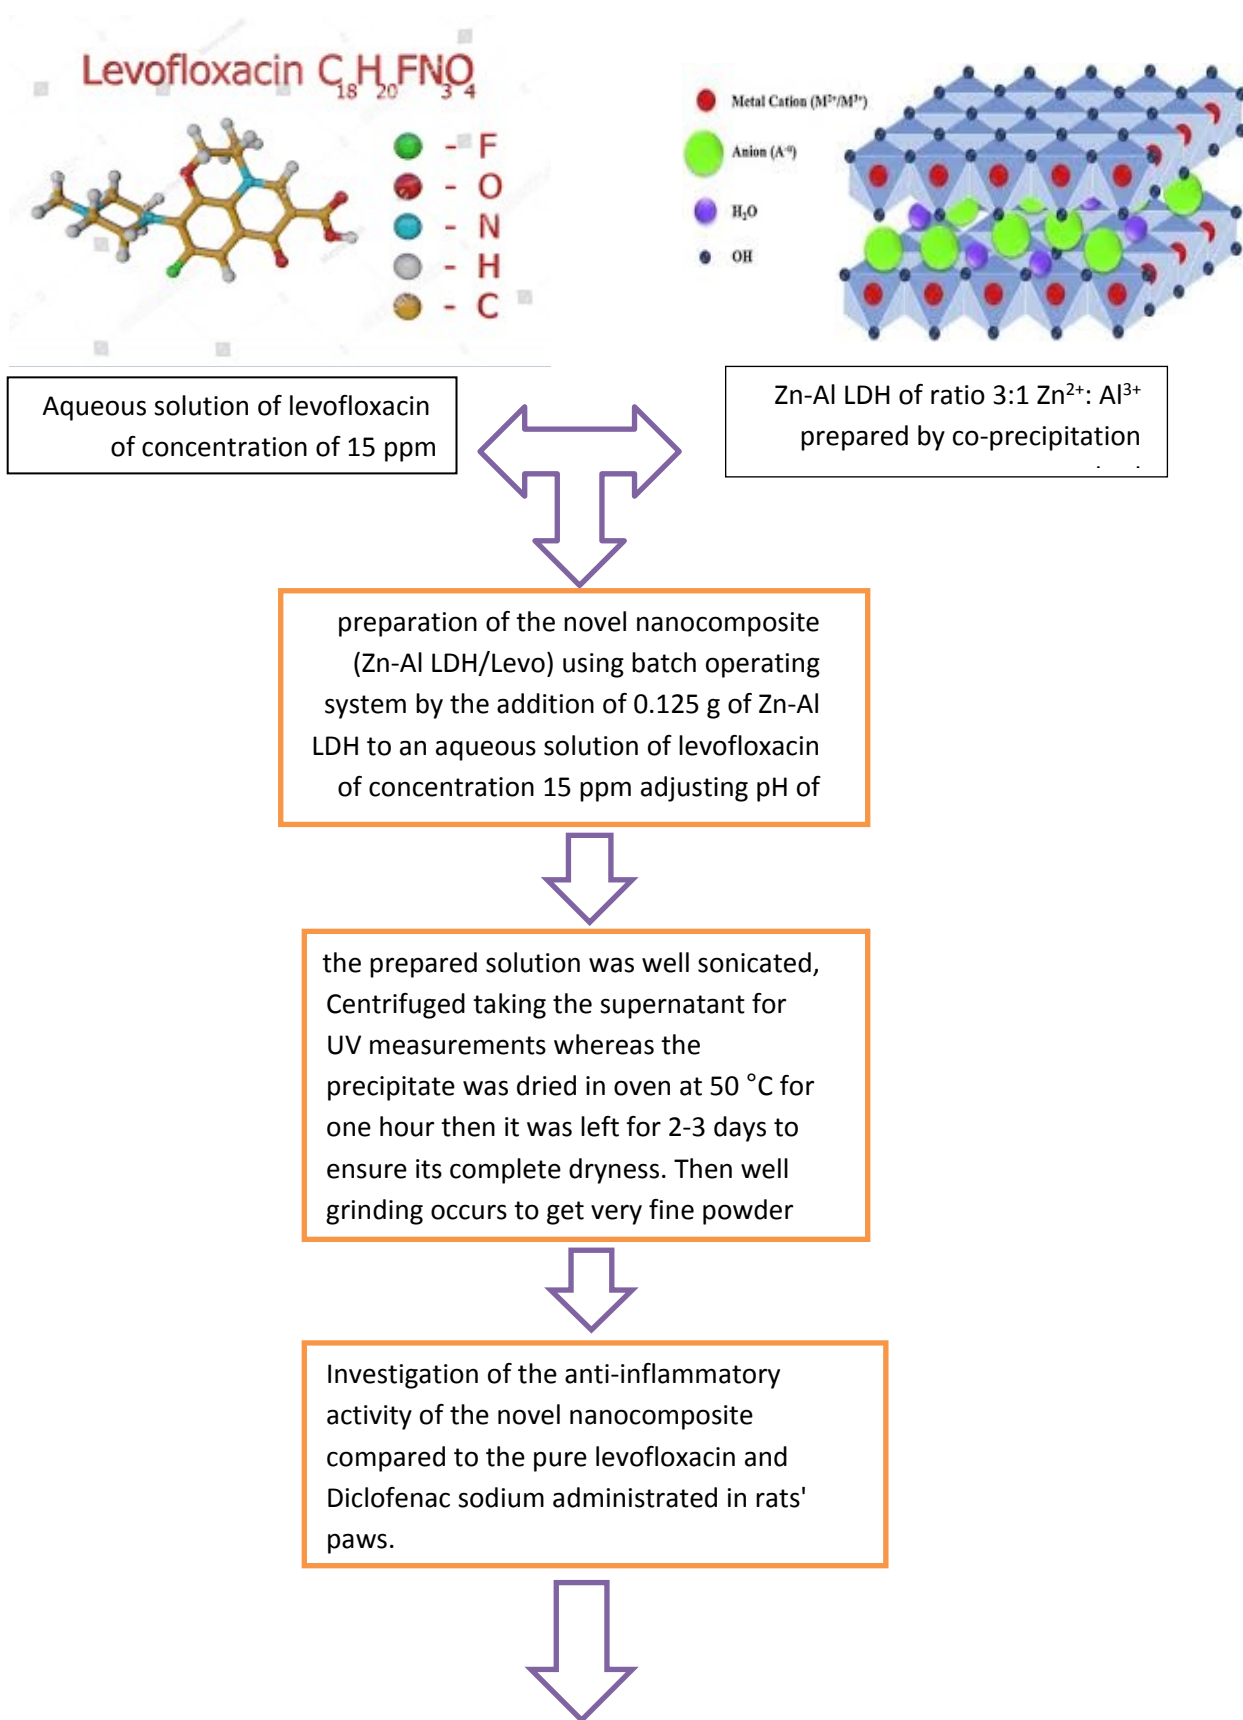

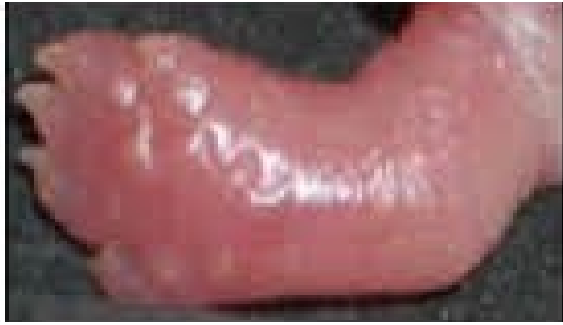

Hind limb induced formalin

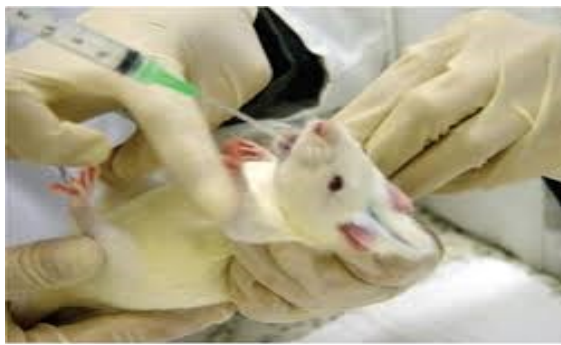

Oral administration of different treatments

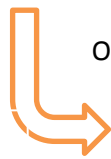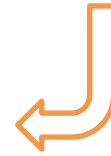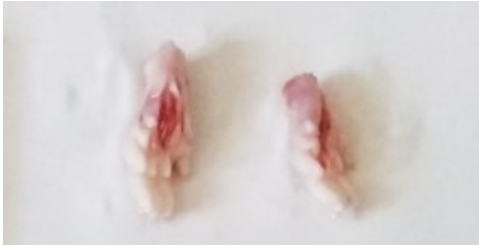

stilled water)

Standard group (Diclofenac Na)  
Standard Zn-Al LDH

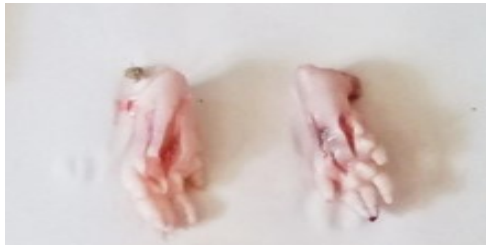

Zn-Al LDH

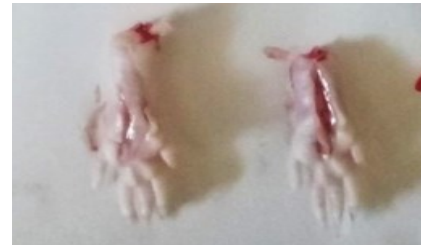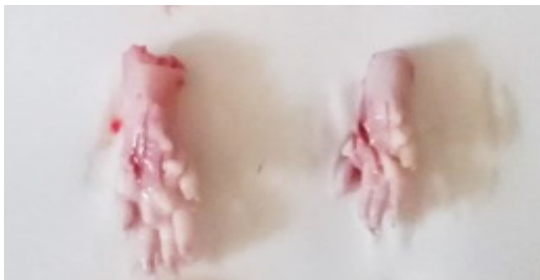

Normal form of Levofloxacin

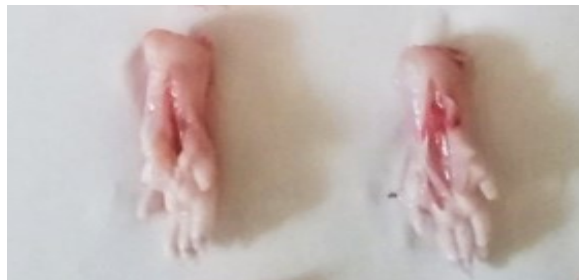

Zn-Al LDH/Levo nanocomposite

**Scheme S1.** Designe of the Experimental work
